# Supplementary material for: Peer clustering of exercise and eating behaviours among young adults in Sweden: a cross-sectional study of egocentric network data
Source: Springer Nature journal article supplement (doi:10.1186/1471-2458-13-784), 2013-08-28

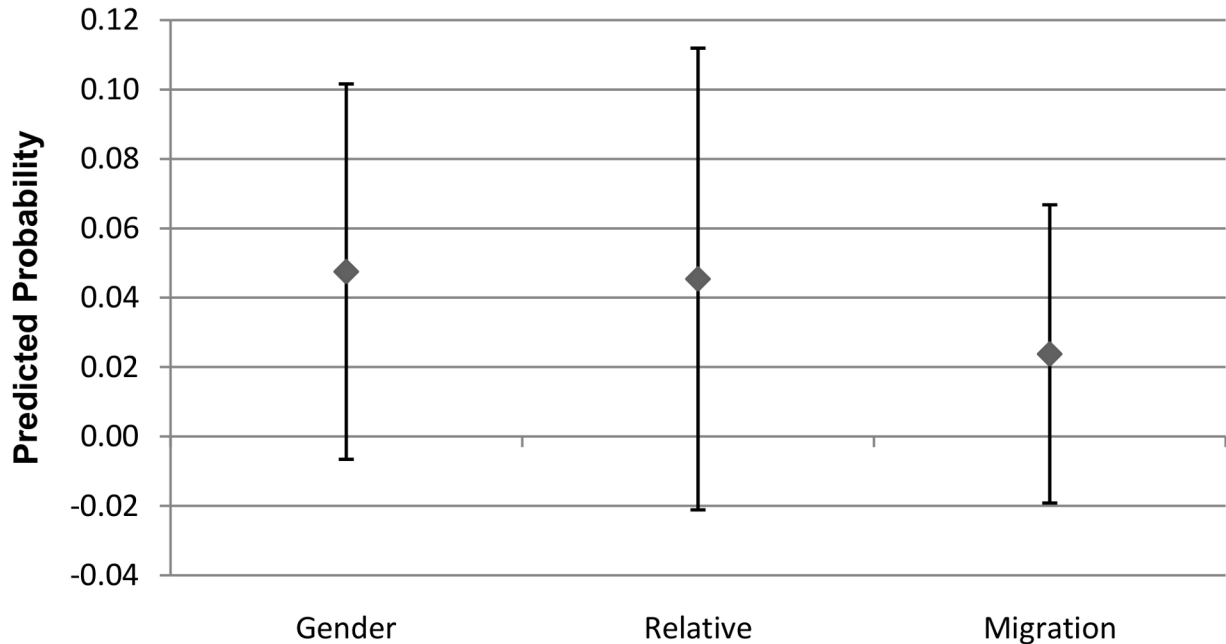

Supplement: 12889_2013_5738_MOESM12_ESM.pdf [file 12889_2013_5738_MOESM12_ESM.pdf]
